# Supplementary material
Source: MDPI journal article supplement (https://www.mdpi.com/1424-2818/15/2/134)
Supplement: s1 [file s1]

**Table S1.** Taxa, voucher information, infrageneric category, and GenBank accession numbers for ETS, *ndhF*, *rpl16*, and *trnH-psbA*, respectively. Sequences obtained for this study are indicated with an asterisk (\*) and regions with no sequence data are indicated with a dash (-); herbarium acronyms follow [84].

| Ingroup taxa ( <i>Paspalum</i> L.)          | Voucher                                           | Subgenus            | Informal group | ETS       | <i>ndhF</i> | <i>rpl16</i> | <i>trnH-psbA</i> |
|---------------------------------------------|---------------------------------------------------|---------------------|----------------|-----------|-------------|--------------|------------------|
| <i>Paspalum acuminatum</i> Raddi            | Argentina, Entre Ríos, O. Morrone 5367 (SI)       | <i>Paspalum</i>     | Dissecta       | KF852793  | KF852901    | KF853013     | –                |
| <i>Paspalum acutifolium</i> León            | Cuba, Matanzas, E.L. Ekman 18835 (NY)             | <i>Paspalum</i>     | Caespitosa     | OP947795* | OP947821*   | –            | OP947843*        |
| <i>Paspalum alnum</i> Chase                 | Argentina, Entre Ríos, O. Morrone 5287 (SI)       | <i>Paspalum</i>     | Alma           | –         | KF852933    | KF853035     | –                |
| <i>Paspalum alstonii</i> Chase              | Venezuela, Táchira, O. Morrone 4702 (SI)          | <i>Harpostachys</i> |                | KF852779  | KF852893    | KF853004     | –                |
| <i>Paspalum atratum</i> Swallen             | Bolivia, La Paz, O. Morrone 4858 (SI)             | <i>Paspalum</i>     | Plicatula      | KF852788  | KF852896    | KF853008     | –                |
| <i>Paspalum bakeri</i> Hack.                | The Bahamas, Great Abaco, D.S. Correll 47669 (NY) | <i>Paspalum</i>     | Caespitosa     | OP947796* | OP947822*   | OP947815*    | OP947844*        |
| <i>Paspalum bertonii</i> Hack.              | Argentina, Misiones, F.O. Zuloaga 7186 (SI)       | <i>Paspalum</i>     | Bertoniana     | KF852787  | KF852997    | KF853007     | OP947845*        |
| <i>Paspalum biaristatum</i> Filg. & Davidse | Brazil, Goiás, G.H. Rua 636 (BAA)                 | <i>Ceresia</i>      |                | KF852821  | KF852929    | KF853031     | –                |
| <i>Paspalum blodgettii</i> Chapm.           | Cuba, Holguín, F.O. Zuloaga 9604 (SI)             | <i>Paspalum</i>     | Caespitosa     | OP947797* | OP947823*   | OP947816*    | OP947846*        |
| <i>Paspalum boscianum</i> Flügge            | Puerto Rico, F.S. Axelrod & H. Stenzel 11108      | <i>Paspalum</i>     | Plicatula      | KF852887  | KF852989    | KF853095     | –                |
| <i>Paspalum buchtienii</i> Hack.            | Bolivia, La Paz, O. Morrone 4201 (SI)             | <i>Ceresia</i>      |                | –         | KF852995    | KF853099     | OP947847*        |
| <i>Paspalum caespitosum</i> Flügge (1)      | Mexico, Quintana Roo, O. Morrone 3656 (SI)        | <i>Paspalum</i>     | Caespitosa     | KF852849  | KF852959    | KF853059     | –                |
| <i>Paspalum caespitosum</i> (2)             | Cuba, Guantánamo, F.O. Zuloaga 9607 (SI)          | <i>Paspalum</i>     | Caespitosa     | OP947798* | OP947824*   | –            | OP947848*        |

|                                                             |                                              |                     |               |                         |                       |           |
|-------------------------------------------------------------|----------------------------------------------|---------------------|---------------|-------------------------|-----------------------|-----------|
| <i>Paspalum campylostachyum</i> (Hack.) S. Denham           | Venezuela, Táchira, O. Morrone 4702 (SI)     | <i>Harpostachys</i> |               | KF852843 KF852952       | KF853052              | –         |
| <i>Paspalum candidum</i> (Humb. & Bonpl. ex Flüggé) Kunth   | Mexico, Oaxaca, F.O. Zuloaga 7396 (SI)       | <i>Paspalum</i>     | Racemosa      | KF852803 KF852911       | KF853019              | –         |
| <i>Paspalum capillifolium</i> Hack.                         | Cuba, Camaguey, F.O. Zuloaga 9630 (SI)       | <i>Paspalum</i>     | Rupestria     | KF852862 KF852964       | KF853072              | –         |
| <i>Paspalum ceresia</i> (Kuntze) Chase                      | Argentina, Jujuy, O. Morrone 4386 (SI)       | <i>Ceresia</i>      |               | KF852831 KF852940       | KF853040              | –         |
| <i>Paspalum chacoense</i> Parodi (1)                        | Paraguay, Boquerón, C.L. Quarín 3630 (MO)    | <i>Paspalum</i>     | Caespitosa    | KF852802 KF852910       | KF853018              | –         |
| <i>Paspalum chacoense</i> (2)                               | Argentina, Formosa, A. Burkart 20258 (SI)    | <i>Paspalum</i>     | Caespitosa    | –                       | OP947825*<br>–        | OP947849* |
| <i>Paspalum chaseanum</i> Parodi                            | Paraguay, R.H. Fortunato 8742 (BAB)          | <i>Paspalum</i>     | Plicatula     | KF852799 KF852907       | EU871098              | –         |
| <i>Paspalum cinerascens</i> (Döll) A.G. Burm. & C.N. Bastos | Paraguay, Amambay, F.O. Zuloaga 7305 (SI)    | <i>Harpostachys</i> |               | KF852778 KF852997       | KF853003              | –         |
| <i>Paspalum commune</i> Lillo                               | Argentina, Salta, F.O. Zuloaga 8480 (SI)     | <i>Paspalum</i>     | Macrophylla   | KF852812 KF852920       | EU871095              | –         |
| <i>Paspalum corcovadense</i> Raddi                          | Brazil, Rio de Janeiro, M. Nadruz 2164 (RB)  | <i>Paspalum</i>     | Corcovadensia | OP947799 OP947826*<br>* | –                     | –         |
| <i>Paspalum cordatum</i> Hack.                              | Brazil, Paraná, H.M. Longhi-Wagner 9441 (SI) | <i>Ceresia</i>      |               | KF852830 KF852939       | KF853039              | –         |
| <i>Paspalum coryphaeum</i> Trin.                            | Brazil, São Paulo, F.O. Zuloaga 8933 (SI)    | <i>Paspalum</i>     | Coryphaea     | –                       | KF852919<br>EU871096  | –         |
| <i>Paspalum dasyleurum</i> Kuntze                           | Chile, Los Lagos, F.O. Zuloaga 7242 (SI)     | <i>Paspalum</i>     | Dilatata      | KF852790 KF852898       | KF853010              | –         |
| <i>Paspalum dasytrichium</i> Dusén ex Swallen               | Brazil, O. Morrone 5381 (SI)                 | <i>Paspalum</i>     | Coryphaea     | KF852874 KF852976       | EU871068              | –         |
| <i>Paspalum decumbens</i> Sw.                               | Bolivia, La Paz, O. Morrone 4231 (SI)        | <i>Harpostachys</i> |               | KF852877 KF852979       | KF853086<br>OP947851* |           |

|                                               |                                                      |                 |             |                   |           |           |
|-----------------------------------------------|------------------------------------------------------|-----------------|-------------|-------------------|-----------|-----------|
| <i>Paspalum denticulatum</i> Trin. (1)        | Argentina, Formosa, C.L. Quarín 4196 (SI)            | <i>Paspalum</i> | Livida      | KF852808 KF852916 | KF853024  | –         |
| <i>Paspalum denticulatum</i> (2)              | Paraguay, Presidente Hayes, F.O. Zuloaga 7319 (SI)   | <i>Paspalum</i> | Livida      | KF852875 KF852977 | KF853084  | –         |
| <i>Paspalum denticulatum</i> (3)              | Argentina, Jujuy, F.O. Zuloaga 8607 (SI)             | <i>Paspalum</i> | Livida      | KF852850 KF852960 | KF853060  | –         |
| <i>Paspalum distichum</i> L.                  | Uruguay, Río Negro, O. Morrone 5242 (SI)             | <i>Paspalum</i> | Disticha    | KF852780 KF852892 | EU871051  | –         |
| <i>Paspalum distortum</i> Chase               | Cuba, Pinar del Río, F.O. Zuloaga 9563 (SI)          | <i>Paspalum</i> | Filiformia  | KF852863 KF852965 | KF853073  | –         |
| <i>Paspalum durifolium</i> Mez                | Brazil, Rio Grande do Sul, J.F.M. Valls 12282 (MO)   | <i>Paspalum</i> | Ungrouped   | KF852801 KF852909 | KF853017  | –         |
| <i>Paspalum ekmanianum</i> Henrard            | Bolivia, Santa Cruz, O. Morrone 5061 (SI)            | <i>Paspalum</i> | Lachnea     | KF852796 KF852904 | KF853016  | OP947852* |
| <i>Paspalum equitans</i> Mez                  | Argentina, Misiones, F.O. Zuloaga 7154 (SI)          | <i>Paspalum</i> | Ungrouped   | KF852804 KF852912 | KF853020  | OP947853* |
| <i>Paspalum erianthum</i> Nees ex Trin.       | Bolivia, Santa Cruz, O. Morrone 4291 (SI)            | <i>Paspalum</i> | Eriantha    | KF852825 KF852934 | EU871067  | –         |
| <i>Paspalum eucomum</i> Nees ex Trin.         | Brazil, Minas Gerais, H.M. Longhi-Wagner 9599 (ICN)  | <i>Ceresia</i>  |             | KF852869 KF852971 | KF853079  | –         |
| <i>Paspalum fasciculatum</i> Willd. Ex Flüggé | Mexico, Oaxaca, F.O. Zuloaga 7417 (SI)               | <i>Paspalum</i> | Fasciculata | KF852785 KF852895 | KF853005  | –         |
| <i>Paspalum fimbriatum</i> Kunth (1)          | Mexico, Quintana Roo, O. Morrone 3651 (SI)           | <i>Paspalum</i> | Fimbriata   | KF852798 KF852906 | EU871065  | –         |
| <i>Paspalum fimbriatum</i> (2)                | Venezuela, Miranda, O. Morrone 4664 (SI)             | <i>Paspalum</i> | Fimbriata   | KF852868 KF852970 | KF853078  | –         |
| <i>Paspalum galapageium</i> Chase             | Ecuador, Galapagos, L. Fowler 65 (MO)                | <i>Paspalum</i> | Caespitosa  | –                 | OP947827* | –         |
| <i>Paspalum gardnerianum</i> Nees             | Brazil, Distrito Federal, T.S.Filgueiras 3480 (FURB) | <i>Paspalum</i> | Gardneriana | KF852829 KF852938 | KF853038  | –         |
| <i>Paspalum geminiflorum</i> Steud.           | Bolivia, Santa Cruz, O. Morrone 4964 (SI)            | <i>Paspalum</i> | Plicatula   | KF852883 KF852985 | KF853091  | OP947855* |

|                                                       |                                               |                 |               |          |          |           |           |
|-------------------------------------------------------|-----------------------------------------------|-----------------|---------------|----------|----------|-----------|-----------|
| <i>Paspalum glabrinode</i> (Hack.) Morrone & Zuloaga  | Argentina, Misiones, F.O. Zuloaga 6809 (SI)   | <i>Paspalum</i> | Ungrouped     | –        | KF852894 | EU871057  | –         |
| <i>Paspalum haumanii</i> Parodi                       | Argentina, Santa Fe, C.L. Quarín 3854 (SI)    | <i>Paspalum</i> | Virgata       | KF852816 | KF852924 | EU871080  | –         |
| <i>Paspalum heterotrichon</i> Trin.                   | Venezuela, Miranda, O. Morrone 4739 (SI)      | <i>Ceresia</i>  |               | KF852840 | KF852949 | KF853049  | OP947856* |
| <i>Paspalum humboldtianum</i> Flügge                  | Argentina, Córdoba, O. Morrone 5165 (SI)      | <i>Ceresia</i>  |               | KF852871 | KF852973 | KF853081  | OP947857* |
| <i>Paspalum hyalinum</i> Nees ex Trin.                | Paraguay, Amambay, F.O. Zuloaga 7279 (SI)     | <i>Paspalum</i> | Parviflora    | KF852876 | KF852978 | KF853085  | –         |
| <i>Paspalum inaequivalve</i> Raddi                    | Argentina, Entre Ríos, F.O. Zuloaga 7035 (SI) | <i>Paspalum</i> | Inaequivalvia | KF852847 | KF852957 | KF853057  | –         |
| <i>Paspalum indecorum</i> Mez (1)                     | Argentina, Misiones, F.O. Zuloaga 7142 (SI)   | <i>Paspalum</i> | Caespitosa    | KF852867 | KF852969 | KF853077  | –         |
| <i>Paspalum indecorum</i> (2)                         | Argentina, Misiones, O. Morrone 1756 (SI)     | <i>Paspalum</i> | Caespitosa    | OP947800 | OP947828 | OP947817* | OP947858* |
| <i>Paspalum intermedium</i> Munro ex Morong & Britton | Argentina, A. Schinini 28857 (CETS)           | <i>Paspalum</i> | Virgata       | KF852817 | KF852925 | EU871081  | –         |
| <i>Paspalum ionanthum</i> Chase                       | Argentina, Corrientes, F.O. Zuloaga 7112 (SI) | <i>Paspalum</i> | Notata        | KF852837 | KF852946 | KF853046  | –         |
| <i>Paspalum juergensii</i> Hack.                      | Bolivia, La Paz, O. Morrone 4188 (SI)         | <i>Paspalum</i> | Paniculata    | KF852873 | KF852975 | KF853083  | OP947859* |
| <i>Paspalum lanciflorum</i> Trin.                     | Venezuela, Bolivar, O. Morrone 4760 (SI)      | <i>Ceresia</i>  |               | KF852841 | KF852950 | KF853050  | –         |
| <i>Paspalum laxum</i> Lam.                            | Mexico, Jalisco, R. McVaugh 19650 (NY)        | <i>Paspalum</i> | Caespitosa    | OP947801 | OP947829 | –         | OP947860* |
| <i>Paspalum ligulare</i> Nees                         | Nicaragua, León, R.W. Pohl 12711 (MO)         | <i>Paspalum</i> | Caespitosa    | OP947802 | OP947830 | –         | OP947861* |
| <i>Paspalum lindenianum</i> A. Rich.                  | Cuba, Guantánamo, F.O. Zuloaga 9614 (SI)      | <i>Paspalum</i> | Filiformia    | KF852864 | KF852966 | KF853074  | –         |
| <i>Paspalum lineare</i> Trin.                         | Bolivia, Santa Cruz, O. Morrone 4301 (SI)     | <i>Paspalum</i> | Linearia      | KF852846 | KF852956 | KF853056  | –         |

|                                                |                                                  |                  |               |           |           |           |           |
|------------------------------------------------|--------------------------------------------------|------------------|---------------|-----------|-----------|-----------|-----------|
| <i>Paspalum longiaristatum</i> Filg. & Davidse | Brazil, Goiás, G.H. Rua 685 (CEN)                | <i>Ceresia</i>   |               | KF852820  | KF852928  | KF853030  | –         |
| <i>Paspalum macranthecium</i> Parodi           | Paraguay, Amambay, F.O. Zuloaga 7261 (SI)        | <i>Paspalum</i>  | Plicatula     | KF852886  | KF852988  | KF853094  | –         |
| <i>Paspalum macrophyllum</i> Kunth             | Venezuela, Táchira, O. Morrone 4705 (SI)         | <i>Paspalum</i>  | Macrophylla   | KF852828  | KF852937  | EU871073  | –         |
| <i>Paspalum maculosum</i> Trin.                | Argentina, Misiones, F.O. Zuloaga 7216 (SI)      | <i>Paspalum</i>  | Maculosa      | KF852823  | KF852931  | KF853033  | OP947862* |
| <i>Paspalum malacophyllum</i> Trin.            | Brazil, Santa Catarina, J.F.M. Valls 14411 (CEN) | <i>Anachyris</i> |               | KF852835  | KF852944  | KF853044  | –         |
| <i>Paspalum malmeanum</i> Ekman                | Bolivia, Santa Cruz, O. Morrone 4991b (SI)       | <i>Ceresia</i>   |               | KF852839  | KF852948  | KF853048  | –         |
| <i>Paspalum maritimum</i> Trin.                | Brazil, Rio de Janeiro, F.O. Zuloaga 8974 (SI)   | <i>Paspalum</i>  | Paniculata    | KF852884  | KF852986  | KF853092  | –         |
| <i>Paspalum microstachyum</i> J. Presl         | Venezuela, Cojedes, O. Morrone 4683 (SI)         | <i>Paspalum</i>  | Inaequivalvia | KF852805  | KF852913  | KF853021  | OP947863* |
| <i>Paspalum minus</i> E. Fourn.                | Argentina, Entre Ríos, F.O. Zuloaga 7040 (SI)    | <i>Paspalum</i>  | Notata        | KF852824  | KF852932  | KF853034  | –         |
| <i>Paspalum modestum</i> Mez                   | Argentina, Corrientes, F.O. Zuloaga 6925 (SI)    | <i>Paspalum</i>  | Plicatula     | KF852880  | KF852982  | KF853089  | –         |
| <i>Paspalum molle</i> Poir.                    | Venezuela, Trujillo, O. Morrone 4730 (SI)        | <i>Paspalum</i>  | Caespitosa    | OP947803* | OP947831* | OP947818* | OP947864* |
| <i>Paspalum multicaule</i> Poir.               | Venezuela, Portuguesa, O. Morrone 4686 (SI)      | <i>Paspalum</i>  | Parviflora    | KF852889  | KF852991  | –         | OP947865* |
| <i>Paspalum notatum</i> Alain ex Flügge (1)    | Venezuela, Miranda, O. Morrone 4746 (SI)         | <i>Paspalum</i>  | Notata        | KF852832  | KF852941  | KF853041  | –         |
| <i>Paspalum notatum</i> (2)                    | Argentina, Tucumán, A.M. Cialdella 138 (SI)      | <i>Paspalum</i>  | Notata        | –         | OP947832* | OP947819* | –         |
| <i>Paspalum oligostachyum</i> Salzm. ex Steud. | Brazil, Bahia, F.O. Zuloaga 9043 (SI)            | <i>Paspalum</i>  | Paniculata    | KF852865  | KF852967  | KF853075  | –         |
| <i>Paspalum orbiculatum</i> Poir.              | Argentina, Entre Ríos, F.O. Zuloaga 7039 (SI)    | <i>Paspalum</i>  | Orbiculata    | KF852792  | KF852900  | KF853012  | OP947866* |
| <i>Paspalum ovale</i> Nees ex Steud.           | Argentina, Misiones, F.O. Zuloaga 7123 (SI)      | <i>Paspalum</i>  | Ovalia        | KF852822  | KF852930  | KF853032  | –         |

|                                               |                                               |                     |            |                          |              |               |
|-----------------------------------------------|-----------------------------------------------|---------------------|------------|--------------------------|--------------|---------------|
| <i>Paspalum pallens</i> Swallen               | Bolivia, Santa Cruz, O. Morrone 5000 (SI)     | <i>Paspalum</i>     | Linearia   | KF852833 KF852942        | KF85304<br>2 | –             |
| <i>Paspalum palustre</i> Mez                  | Argentina, A, Bordon 110 (CTES)               | <i>Paspalum</i>     | Plicatula  | KF852813 KF852921        | EU87107<br>0 | –             |
| <i>Paspalum parviflorum</i> Rhode ex Flügge   | Brazil, Bahia, F.O. Zuloaga 8997 (SI)         | <i>Paspalum</i>     | Parviflora | KF852882 KF852984        | KF85309<br>0 | OP94786<br>7* |
| <i>Paspalum pauciciliatum</i> (Parodi) Herter | Argentina, Misiones, F.O. Zuloaga 7191 (SI)   | <i>Paspalum</i>     | Dilatata   | KF852807 KF852915        | KF85302<br>3 | –             |
| <i>Paspalum penicillatum</i> Hook f.          | Bolivia, La Paz, O. Morrone 4808 (SI)         | <i>Paspalum</i>     | Racemosa   | KF852794 KF852902        | KF85301<br>4 | –             |
| <i>Paspalum petilum</i> Chase                 | Venezuela, Bolivar, O. Morrone 4783 (SI)      | <i>Ceresia</i>      |            | KF852844 KF852953        | KF85305<br>3 | –             |
| <i>Paspalum petrense</i> A.G. Burm.           | Brazil, T.S. Filgueiras 3510                  | <i>Ceresia</i>      |            | KF852870 KF852972        | KF85308<br>0 | –             |
| <i>Paspalum pilosum</i> Lam.                  | Venezuela, Bolivar, O. Morrone 4778 (SI)      | <i>Harpostachys</i> |            | KF852885 KF852987        | KF85309<br>3 | OP94786<br>8* |
| <i>Paspalum pleostachyum</i> Döll             | Puerto Rico, Maricao, G.R. Proctor 43826 (US) | <i>Paspalum</i>     | Caespitosa | OP947804 OP947833<br>* * | –            | OP94786<br>9* |
| <i>Paspalum plicatulum</i> Michx.             | Argentina, Salta, F.O. Zuloaga 8477 (SI)      | <i>Paspalum</i>     | Plicatula  | KF852881 KF852983        | EU87107<br>6 | –             |
| <i>Paspalum polyphyllum</i> Nees ex Trin.     | Brazil, Paraná, H.M. Longhi-Wagner 9418 (ICN) | <i>Ceresia</i>      |            | KF852836 KF852945        | KF85304<br>5 | –             |
| <i>Paspalum procerum</i> S. Denham            | Venezuela, Táchira, O. Morrone 4740 (SI)      | <i>Harpostachys</i> |            | KF852842 KF852951        | KF85305<br>1 | OP94787<br>0* |
| <i>Paspalum prostratum</i> Scribn. & Merr.    | Venezuela, Táchira, O. Morrone 4709 (SI)      | <i>Paspalum</i>     | Racemosa   | KF852866 KF852968        | KF85307<br>6 | –             |
| <i>Paspalum pubiflorum</i> Rupr. ex E. Fourn. | Mexico, Puebla, F.O. Zuloaga 7379 (SI)        | <i>Paspalum</i>     | Livida     | KF852810 KF852918        | KF85302<br>6 | –             |
| <i>Paspalum pulchellum</i> Kunth              | Cuba, Pinar del Río, F.O. Zuloaga 9541 (SI)   | <i>Paspalum</i>     | Reimaria   | KF852878 KF852980        | KF85308<br>7 | –             |
| <i>Paspalum pumilum</i> Nees                  | Brazil, Paraná, O. Morrone 5383 (SI)          | <i>Paspalum</i>     | Notata     | KF852838 KF852947        | KF85304<br>7 | OP94787<br>1* |
| <i>Paspalum pygmaeum</i> Hack.                | Venezuela, Mérida, O. Morrone 4726 (SI)       | <i>Paspalum</i>     | Racemosa   | KF852888 KF852990        | –            | –             |

|                                                                |                                                 |                     |                  |                       |          |           |
|----------------------------------------------------------------|-------------------------------------------------|---------------------|------------------|-----------------------|----------|-----------|
| <i>Paspalum quadrifarium</i> Lam.                              | Argentina, Buenos Aires, L.M. Giussani 320 (SI) | <i>Paspalum</i>     | Quadrifaria      | KF852797 KF852905     | EU871055 | –         |
| <i>Paspalum rawitscheri</i> (Parodi) Chase ex G.H. Rua & Valls | Brazil, Rio Grande do Sul, G.H. Rua 728 (CEN)   | Ungrouped           |                  | KF852819 KF852927     | KF853029 | –         |
| <i>Paspalum redondense</i> Swallen (1)                         | Brazil, Paraná, J.F.M. Valls 11370 (CEN)        | <i>Paspalum</i>     | Caespitosa       | KF852826 KF852935     | KF853036 | –         |
| <i>Paspalum redondense</i> (2)                                 | Brazil, Paraná, G. Hatschbach 50346 (NY)        | <i>Paspalum</i>     | Caespitosa       | OP947805 OP947834 * * | –        | OP947874* |
| <i>Paspalum redundans</i> Chase                                | Ecuador, Galapagos, J.T. Howell 9902 (SI)       | <i>Paspalum</i>     | Caespitosa       | OP947806 OP947835 * * | –        | OP947875* |
| <i>Paspalum regnellii</i> Mez                                  | Argentina, A.I. Honfi 130 (SI)                  | <i>Paspalum</i>     | Macrophylla      | KF852800 KF852908     | EU871090 | –         |
| <i>Paspalum repandum</i> (Nees) G.H. Rua & Valls               | Brazil, Paraná, P.K.H. Dusén 10478 (NY)         | Ungrouped           |                  | – OP947836 *          | –        | –         |
| <i>Paspalum repens</i> P.J. Bergius                            | Argentina, Entre Ríos, O. Morrone 5193 (SI)     | <i>Paspalum</i>     | Dissecta         | KF852789 KF852897     | KF853009 | –         |
| <i>Paspalum restingense</i> Renvoize                           | Brazil, Bahia, F.O. Zuloaga 9014 (SI)           | <i>Paspalum</i>     | Corcovadensia    | KF852848 KF852958     | KF853058 | –         |
| <i>Paspalum robustum</i> S. Denham                             | Venezuela, Bolivar, O. Morrone 4787 (SI)        | <i>Harpostachys</i> |                  | KF852851 KF852961     | KF853061 | –         |
| <i>Paspalum rufum</i> Nees ex Steud (1)                        | Argentina, Santa Fe, C.L. Quarín 3754 (SI)      | <i>Paspalum</i>     | Eriantha/Virgata | KF852815 KF852923     | EU871089 | OP947876* |
| <i>Paspalum rufum</i> (2)                                      | Argentina, Corrientes, F.O. Zuloaga 7110 (SI)   | <i>Paspalum</i>     | Eriantha/Virgata | KF852814 KF852922     | EU871077 | –         |
| <i>Paspalum rupestre</i> Nees                                  | Cuba, Holgún, F.O. Zuloaga 9588 (SI)            | <i>Paspalum</i>     | Rupestria        | KF852860 KF852962     | KF853070 | –         |
| <i>Paspalum saccharoides</i> Nees ex Trin.                     | Bolivia, La Paz, O. Morrone 4211 (SI)           | <i>Paspalum</i>     | Saccharoidea     | KF852795 KF852903     | KF853015 | –         |
| <i>Paspalum sauetii</i> Chase                                  | Cuba, Guantánamo, F.O. Zuloaga 9610 (SI)        | <i>Paspalum</i>     | Rupestria        | KF852861 KF852963     | KF853071 | –         |
| <i>Paspalum simplex</i> Morong                                 | Argentina, Corrientes, O. Morrone 5311 (SI)     | <i>Anachyris</i>    |                  | KF852872 KF852974     | KF853082 | OP947877* |

|                                                         |                                                   |                     |             |            |             |               |                  |
|---------------------------------------------------------|---------------------------------------------------|---------------------|-------------|------------|-------------|---------------|------------------|
| <i>Paspalum squamulatum</i> E. Fourn.                   | Mexico, Oaxaca, F.O. Zuloaga 7389 (SI)            | <i>Paspalum</i>     | Paniculata  | KF852791   | KF852899    | KF85301<br>1  | OP94787<br>3*    |
| <i>Paspalum stellatum</i> Humb. & Bonpl. ex Flügge      | Venezuela, Miranda, O. Morrone 4745 (SI)          | <i>Ceresia</i>      |             | KF852818   | KF852926    | KF85302<br>8  | –                |
| <i>Paspalum subesquiglume</i> Döll                      | Brazil, Goiás, G.H. Rua 777 (BAA)                 | <i>Paspalum</i>     | Gardneriana | KF852827   | KF852936    | KF85303<br>7  | –                |
| <i>Paspalum thrasyoides</i> (Trin.) S. Denham           | Brazil, Distrito Federal, G.H. Rua 654 (SI)       | <i>Harpostachys</i> |             | KF852879   | KF852981    | KF85308<br>8  | –                |
| <i>Paspalum trinitense</i> (Mez) S. Denham              | Venezuela, O. Morrone 4776 (SI)                   | <i>Harpostachys</i> |             | KF852891   | KF852992    | –             | –                |
| <i>Paspalum umbrosum</i> Trin.                          | Argentina, Corrientes, O. Morrone 5313 (SI)       | <i>Paspalum</i>     | Paniculata  | KF852806   | KF852914    | KF85302<br>2  | OP94787<br>9*    |
| <i>Paspalum unispicatum</i> (Scribn. & Merr.) Nash      | Argentina, Salta, O. Morrone 4344 (SI)            | <i>Harpostachys</i> |             | –          | KF852954    | KF85305<br>4  | OP94787<br>8*    |
| <i>Paspalum usteri</i> Hack.                            | Argentina, Misiones, F.O. Zuloaga 6588 (SI)       | <i>Anachyris</i>    |             | OP947807   | OP947837    | OP94782<br>0* | –                |
| <i>Paspalum volcanense</i> Zuloaga, Morrone & S. Denham | Argentina, Jujuy, O. Morrone 4374 (SI)            | <i>Anachyris</i>    |             | KF852845   | KF852955    | KF85305<br>5  | –                |
| <b>Outgroup taxa</b>                                    |                                                   |                     |             | <b>ETS</b> | <b>ndhF</b> | <b>rpl16</b>  | <b>trnH-psbA</b> |
| <i>Anthraenantia lanata</i> (Kunth) Benth.              | Uruguay, Río Negro, O. Morrone 5241 (SI)          |                     |             | –          | MT18018     | OP94780       | OP94783          |
| <i>Axonopus furcatus</i> (Flügge) Hitchc.               | United States, Louisiana, R.D. Thomas 121389 (NY) |                     |             | MT18024    | MT18020     | OP94780       | –                |
| <i>Axonopus obtusifolius</i> (Raddi) Chase              | Brazil, São Paulo, W.D. Clayton 4665 (NY)         |                     |             | 6          | 1           | 9*            | –                |
| <i>Hiladaea pallens</i> (Sw.) C. Silva & R.P. Oliveira  | Argentina, Jujuy, O. Morrone 3209 (SI)            |                     |             | MT18025    | MT18021     | –             | –                |
| <i>Ichnanthus calvescens</i> (Nees ex Trin.) Döll       | Brazil, Bahia, C. Silva 416 (HUEFS)               |                     |             | 6          | 1           | –             | –                |
|                                                         |                                                   |                     |             | KF852858   | AY029638    | KF85306<br>8  | OP94784<br>0*    |
|                                                         |                                                   |                     |             | –          | KP878939    | KP87900       | KP87905          |
|                                                         |                                                   |                     |             |            |             | 0             | 3                |



|                                                                 |                                                |              |               |               |               |
|-----------------------------------------------------------------|------------------------------------------------|--------------|---------------|---------------|---------------|
| <i>Hymenachne</i><br><i>pernambucensis</i> (Spreng.)<br>Zuloaga | Argentina, Corrientes, J.M.<br>Acosta 506 (SI) | –            | AY188478      | OP94781<br>0* | –             |
| <i>Ocellochloa stolonifera</i><br>(Poir.) Zuloaga &<br>Morrone  | Bolivia, Santa Cruz, O.<br>Morrone 4268 (SI)   | –            | KP878959      | OP94781<br>1* | OP94784<br>1* |
| <i>Plagiantha tenella</i><br>Renvoize                           | Brazil, Bahia, F.O. Zuloaga<br>6953 (SI)       | –            | OP947838<br>* | OP94781<br>2* | –             |
| <i>Streptostachys asperifolia</i><br>Desv.                      | Brazil, Bahia, F.O. Zuloaga<br>9023 (SI)       | MT18022<br>7 | EU805483      | OP94781<br>4* | OP94784<br>2* |

**Table S2.** Descriptive statistics for each separate data partition and combined matrices used in parsimony analyses.

| DNA region / dataset        | ETS      | <i>ndhF</i> | <i>rpl16</i> | <i>trnH-psbA</i> | Plastid  | Total dataset |
|-----------------------------|----------|-------------|--------------|------------------|----------|---------------|
| Ingroup (number of taxa)    | 125      | 121         | 93           | 39               | 118      | 119           |
| Caespitosa (number of taxa) | 13       | 13          | 7            | 12               | 13       | 13            |
| Outgroup (number of taxa)   | 4        | 8           | 5            | 5                | 9        | 9             |
| Alignment length (bp)       | 479      | 2062        | 1317         | 610              | 3989     | 4462          |
| Parsimony                   | 259      | 232         | 169          | 13               | 400      | 718           |
| informative sites           | (54.07%) | (11.25%)    | (12.83%)     | (2.13%)          | (10.02%) | (16.09%)      |
| Tree length                 | 1599     | 521         | 453          | 21               | 1024     | 3195          |
| Consistency index (CI)      | 0.328    | 0.543       | 0.510        | 0.667            | 0.497    | 0.370         |
| Retention index (CR)        | 0.638    | 0.753       | 0.667        | 0.851            | 0.670    | 0.584         |

**Table S3.** Chromosome numbers known in taxa of the group Caespitosa of *Paspalum* L.

| Species                      | Gametophytic count ( <i>n</i> ) |            | Sporophytic count (2 <i>n</i> ) |               |
|------------------------------|---------------------------------|------------|---------------------------------|---------------|
|                              | Number                          | References | Number                          | References    |
| <i>Paspalum blodgettii</i>   | 20                              | [73]       | –                               | –             |
| <i>Paspalum caespitosum</i>  | 10                              | [73]       | –                               | –             |
| <i>Paspalum chacoense</i>    | –                               | –          | 20                              | [28,86]       |
| <i>Paspalum indecorum</i>    | 10                              | [72]       | 20                              | [28,73,87,88] |
| <i>Paspalum laxum</i>        | –                               | –          | 60                              | [89]          |
| <i>Paspalum ligulare</i>     | 20                              | [85]       | 20, 40                          | [28]          |
| <i>Paspalum pleostachyum</i> | –                               | –          | 20, 30, 40                      | [28]          |
| <i>Paspalum redondense</i>   | –                               | –          | 20, 40                          | [28]          |
